# Supplementary material for: Ribonuclease J is required for chloroplast and embryo development in Arabidopsis
Source: PubMed Central journal article supplement (PMC4378637; doi:10.1093/jxb/erv010), 2015-02-20
Supplement: supp_erv010_jexbot139691_file001.pdf [file supp_erv010_jexbot139691_file001.pdf]

1 **Title:** Ribonuclease J is required for chloroplast and embryo development in *Arabidopsis*

2 **Running Title:** *AtRNJ* is required for embryogenesis

3 **Authors:** Hongyu Chen, Wenxuan Zou, Jie Zhao \*

4

5 **Address:** State Key Laboratory of Hybrid Rice, College of Life Sciences, Wuhan University,

6 Wuhan 430072, China

7

8 **\*Corresponding author:** Jie Zhao

9 **E-mail:** [jzhao@whu.edu.cn](mailto:jzhao@whu.edu.cn)

10 **Tel:** 86-27-68756010

11

## 12 Supplemental Materials

13 **Table S1.** Primers (5' to 3') used in this study.

| 1.1 Primers for mutant verification       |                                     |                                      | 14       |
|-------------------------------------------|-------------------------------------|--------------------------------------|----------|
|                                           | FP                                  | RP                                   | 15       |
| <i>rnj-1</i>                              | aaaggaaagctggcaacaaaact             | gcgccaaggaagagtaatc                  | 16       |
| <i>rnj-2</i>                              | cctatacttcaccttcgcc                 | tgtattagggtccaatgctgg                | 17       |
| <i>rnj-3</i>                              | tttgatgcgtgactactccc                | agattgatgaagcaccattgg                | 18       |
| CSLB                                      | cccattggacgtgaatgtagacac            |                                      | 19       |
| 1.2 Primers for complementation           |                                     |                                      | 20       |
|                                           | FP                                  | RP                                   | 21       |
| RNJ-gDNA                                  | cgcGGTACCctgggaccaagt<br>gataccggaa | cgcGAGCTCcttgggattg<br>attctgcgtt    | 22<br>23 |
| 1.3 Primers for GUS/GFP fusion constructs |                                     |                                      | 24       |
|                                           | FP                                  | RP                                   | 25       |
| RNJ-Pro-GUS                               | gcgGTCGACctgggaccaag<br>tgataccggaa | gcgAGATCTatcatcactgtat<br>aacaaaacca | 26<br>26 |
| RNJ-Pro-GFP                               | gcgCTGCAGctgggaccaag<br>tgataccggaa | gcgTCTAGAatcatcactgtat<br>aacaaaacca | 27<br>28 |
| 1.4 Primers for qRT-PCR                   |                                     |                                      | 29       |
|                                           | FP                                  | RP                                   | 30       |
| GAPDH                                     | gagtctactggtgtcttcactg              | caaggctggacttgattcgtg                | 31       |
| AtRNJ-qRT                                 | ttggtggagaggtgtttcgtg               | acctctccaattctccacg                  | 32       |

33 SFig. 1 RNase J is a metallo-beta-lactamase and conserved in plants. (A) Phylogenetic tree analysis  
34 of RNJ with TRZ, CPSF73-I and CPSF73-II from *Arabidopsis* and other organisms. The tree was  
35 constructed by the Neighbor-Joining method with MEGA program 4.0. Branch numbers represent  
36 the percentage of bootstrap values in 1000 sampling replicates. Abbreviations: At, *Arabidopsis*  
37 *thaliana*; Hs, *Homo sapiens*; Os, *Oryza sativa*; Gm, *Glycine max*; Sb, *Sorghum bicolor*; Sc,  
38 *Saccharomyces cerevisiae*; Vv, *Vitis vinifera*; Zm, *Zea mays*. (B) Protein comparison of AtTRZs,  
39 AtCPSF73-I, AtCPSF73-II and AtRNJ showing the conserved motifs.

40  
41 SFig. 2 The functional domains of RNJ with respect to the T-DNA insertions. The conserved  
42 domains of RNJ as a metallo-beta-lactamase (I-IV; A-C) are indicated along with the diagnostic  
43 amino acid residues. The Arabic number represents the specific amino acid position in the protein.

44  
45 SFig. 3 The embryo characteristics in wild-type, *rnj-1/+*, and *rnj-3/+* plants. (A-E) Embryos from  
46 the globular stage to the bent cotyledon stage in wild-type ovules. (A) embryo in globular stage; (B)  
47 embryo in transition stage; (C) embryo in heart stage; (D) embryo in torpedo stage; (E) embryo in  
48 bent cotyledon stage. (F-J) The irregular globular *rnj-1* embryos from different development stages  
49 as similar as wild-type embryos showed in (A-E). (K-O) The *rnj-1* embryos with abnormal  
50 cotyledons from different development stages as similar as wild-type embryos showed in (A-E).  
51 (P-T) The irregular globular *rnj-3* embryos from different development stages as similar as  
52 wild-type embryos showed in (A-E). (U-Y) The *rnj-3* embryos with abnormal cotyledons from  
53 different development stages as similar as wild-type embryos showed in (A-E). Scale bars = 20  $\mu$ m.

54  
55 SFig. 4 The down-regulation of *RNJ* expression level after 24h dark treatment. (A) Real-time  
56 quantitative PCR analysis of *RNJ* expression in 7DAG seedlings. CK, control check; Dark, 24h  
57 dark condition; DAG, day after germination. (B-C) GUS staining signals in 7DAG seedlings from  
58 *pRNJ::GUS* transgenic plants. (B) 7DAG seedling in normal light cycles; (C) 7DAG seedling with  
59 6 days normal light cycles and 24h dark condition.

60  
61  
62  
63

Figure S1

(A)

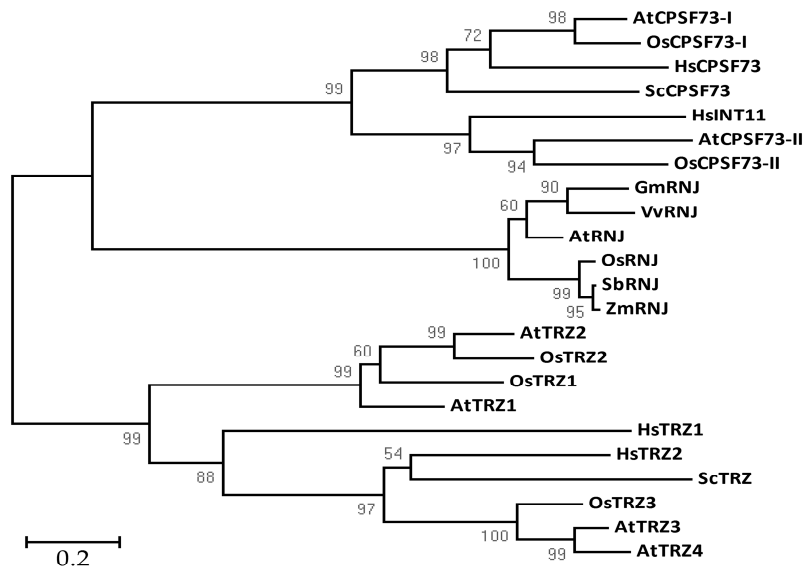

(B)

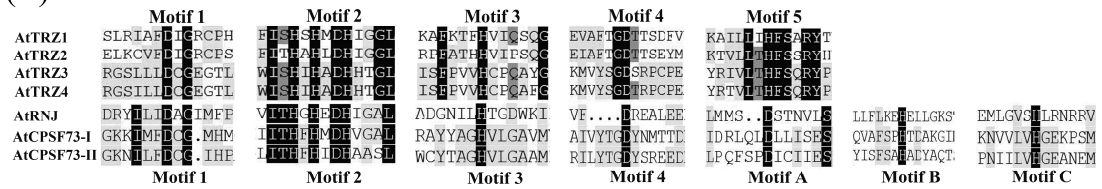

64

65

Figure S2

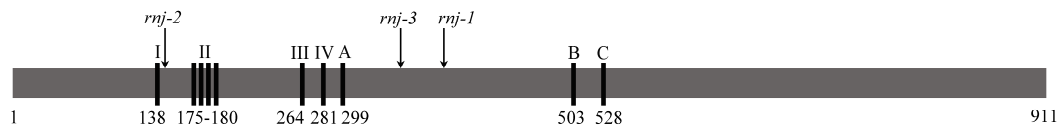

66

67

Figure S3

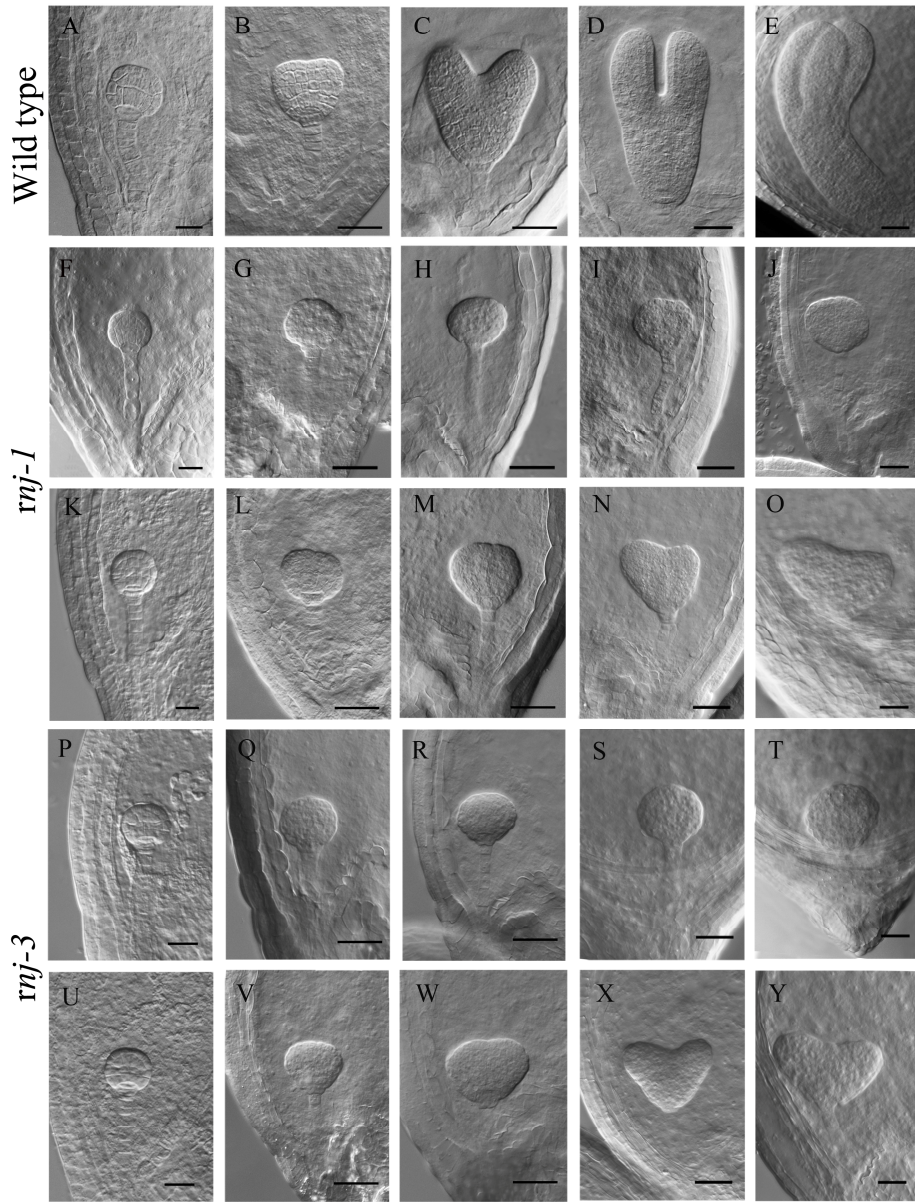

68

69

Figure S4

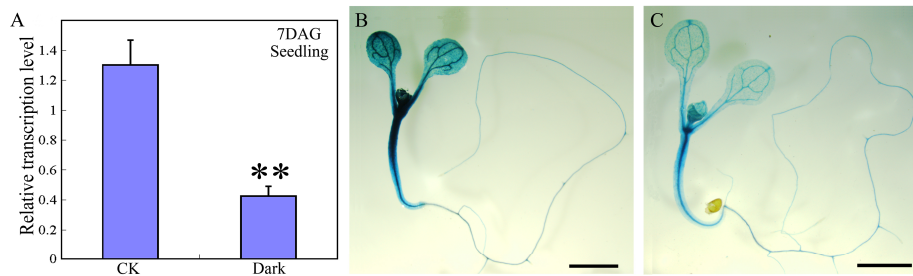

70
